# Supplementary material
Source: ML conference proceedings conference paper supplement (https://openaccess.thecvf.com/content/CVPR2022/html/Li_Video_K-Net_A_CVPR_2022_paper.html)
Supplement: Supplementary file 1 [file Li_Video_K-Net_A_CVPR_2022_supplemental.zip]

Archive with 3 entries (3 files):
- cityscapes_vps_video_2.mp4
- step_video_1.mp4
- 00720-supp.pdf
